# Supplementary material
Source: PubMed Central journal article supplement (PMC6707932)
Supplement: JB.00061-19-s0001.pdf [file JB.00061-19-s0001.pdf]

1 **SUPPLEMENTARY MATERIAL**

2 **MATERIAL AND METHODS**

3  **$\beta$ -galactosidase assays to assess copper inducible *copA* promoter activity.**

4 This assay was performed as previously described with few modification (1). Strains  
5 bearing plasmids with the *lacZ* gene controlled by copper inducible promoter *copAB* were  
6 inoculated from freshly grown colonies into 5 ml marine broth containing 5  $\mu$ g/ml Kan and  
7 incubated at 30°C overnight. Overnight cultures were diluted in the same culture medium to  
8  $OD_{600} = 0.10$  and incubated until an  $OD_{600} = 0.4$  was reached, where copper sulfate dissolved in  
9 marine broth was added to a final concentration of 0 - 250  $\mu$ M. The induced cultures and  
10 controls were incubated for 2 - 4 h at 30 °C.  $\beta$ -galactosidase activity was measured  
11 colorimetrically as described previously (2). Briefly, 200  $\mu$ l of culture was mixed with 600  $\mu$ l Z  
12 buffer (60 mM  $Na_2HPO_4$ , 40 mM  $NaH_2PO_4$ , 10 mM KCl, 1 mM  $MgSO_4$ , 50 mM  $\beta$ -  
13 mercaptoethanol). Cells were then permeabilized using 50  $\mu$ l chloroform and 25  $\mu$ l 0.1% SDS.  
14 200  $\mu$ l of substrate *o*-nitrophenyl-  $\beta$ -D-galactoside (4 mg/ml) was added to the permeabilized  
15 cells. Upon development of a yellow color, the reaction was stopped by raising the pH to 11 with  
16 addition of 400  $\mu$ l of 1 M  $Na_2CO_3$ . Absorbance at 420 nm ( $A_{420}$ ) was determined and the Miller  
17 Units of  $\beta$ -galactosidase activity were calculated as  $(A_{420})(1000)/(OD_{600})(t)(v)$  where  $t$  is the time  
18 in minutes and  $v$  is the volume of culture used in the assay in mL.

19

20 **Growth measurements.**

21 Impact of  $CuSO_4$  on *H. baltica* growth was measured using 24-well plates. 1 ml of cultures  
22 (Starting  $OD_{600} = 0.05$ ) were incubated for 12 h at 30°C, using marine Broth and various  $CuSO_4$   
23 concentrations.  $OD_{600}$  were recorded after overnight incubation to determine the growth yield for  
24 the different  $CuSO_4$  concentrations. Growth curves using 0 or 500  $\mu$ M  $CuSO_4$  were recorded  
25 every 30 min for 20 h. All  $OD_{600}$  were recorded using a Biotek Synergy HT.

26

27 **Table S1: Strains and Plasmids used in this study**

| Strain or Plasmid             | Description and or genotype                                                                                                                                                                                                | Reference or source    |
|-------------------------------|----------------------------------------------------------------------------------------------------------------------------------------------------------------------------------------------------------------------------|------------------------|
| <b><i>E. coli</i></b>         |                                                                                                                                                                                                                            |                        |
| $\alpha$ select               | <i>deoR endA1 relA1 gyrA96 hsdR17(r<sub>K</sub><sup>-</sup>m<sub>K</sub><sup>+</sup>) supE44 thi-1 <math>\Delta</math>(lacZYA-argFV169) <math>\phi</math>80<math>\delta</math>lacZ<math>\Delta</math>M15 F<sup>-</sup></i> | Bioline                |
| YB8430                        | $\alpha$ select /pNPTS139 $\Delta$ <i>hfsA</i>                                                                                                                                                                             | This study             |
| YB8431                        | $\alpha$ select /pNPTS139 $\Delta$ <i>hfsL</i>                                                                                                                                                                             | This study             |
| YB8432                        | $\alpha$ select /pNPTS139 $\Delta$ <i>hfaB</i>                                                                                                                                                                             | This study             |
| YB8439                        | $\alpha$ select /pNPTS139 $\Delta$ <i>hfaD</i>                                                                                                                                                                             | This study             |
| YB8440                        | $\alpha$ select /pNPTS139 $\Delta$ <i>hfsD</i>                                                                                                                                                                             | This study             |
| YB172                         | $\alpha$ select /pNPTS139 $\Delta$ <i>hfsG</i>                                                                                                                                                                             | This study             |
| YB8441                        | $\alpha$ select/ pMR10: <i>hfsA</i>                                                                                                                                                                                        | This study             |
| YB8442                        | $\alpha$ select/ pMR10: <i>Phfa-hfaB</i>                                                                                                                                                                                   | This study             |
| YB8443                        | $\alpha$ select/ pMR10: <i>PhfsE-hfsL</i>                                                                                                                                                                                  | This study             |
| YB8429                        | $\alpha$ select/ pMR10: <i>Pcu-hfsL</i>                                                                                                                                                                                    | This study             |
| YB8433                        | $\alpha$ select/pMR10: <i>PhfaA-hfaD</i>                                                                                                                                                                                   | This study             |
| YB8436                        | $\alpha$ select/ pMR10: <i>hfsD</i>                                                                                                                                                                                        | This study             |
| YB8437                        | $\alpha$ select/ pMR10: <i>Pcu-lacZ</i>                                                                                                                                                                                    | This study             |
| YB173                         | $\alpha$ select/ pMR10: <i>Pcu-hfsG</i>                                                                                                                                                                                    | This study             |
| <b><i>C. Crescentus</i></b>   |                                                                                                                                                                                                                            |                        |
| YB135                         | Wild-type strain CB15                                                                                                                                                                                                      | (3)                    |
| YB4251                        | CB15 $\Delta$ <i>hfaB</i>                                                                                                                                                                                                  | (4)                    |
| <b><i>H. baltica</i></b>      |                                                                                                                                                                                                                            |                        |
| YB5842                        | IFAM 1418 <sup>T</sup> Wild-type strain                                                                                                                                                                                    | (5)                    |
| YB8404                        | YB5842 $\Delta$ <i>hfsA</i>                                                                                                                                                                                                | This study             |
| YB8405                        | YB5842 $\Delta$ <i>hfsL</i>                                                                                                                                                                                                | This study             |
| YB8406                        | YB5842 $\Delta$ <i>hfaB</i>                                                                                                                                                                                                | This study             |
| YB210                         | YB5842 $\Delta$ <i>hfaB</i> $\Delta$ <i>hfaD</i>                                                                                                                                                                           | This study             |
| YB8409                        | YB5842 $\Delta$ <i>hfsA</i> /pMR10: <i>hfsA</i>                                                                                                                                                                            | This study             |
| YB8410                        | YB5842 $\Delta$ <i>hfaB</i> /pMR10: <i>Phfa-hfaB</i>                                                                                                                                                                       | This study             |
| YB8414                        | YB5842 $\Delta$ <i>hfsL</i> /pMR10: <i>PhfsE-hfsL</i>                                                                                                                                                                      | This study             |
| YB8417                        | YB5842 $\Delta$ <i>hfsG</i> $\Delta$ <i>hfaB</i> /pMR10: <i>Pcu-hfsG</i>                                                                                                                                                   | This study             |
| YB8418                        | YB5842 $\Delta$ <i>hfsL</i> $\Delta$ <i>hfaB</i> /pMR10: <i>Pcu-hfsL</i>                                                                                                                                                   | This study             |
| YB8424                        | YB5842 $\Delta$ <i>hfsL</i> /pMR10: <i>Pcu-hfsL</i>                                                                                                                                                                        | This study             |
| YB8425                        | YB5842 $\Delta$ <i>hfaD</i>                                                                                                                                                                                                | This study             |
| YB8426                        | YB5842 $\Delta$ <i>hfaD</i> /pMR10: <i>PhfaA-hfaD</i>                                                                                                                                                                      | This study             |
| YB8427                        | YB5842 $\Delta$ <i>hfsD</i>                                                                                                                                                                                                | This study             |
| YB8434                        | YB5842 $\Delta$ <i>hfsD</i> /pMR10: <i>hfsD</i>                                                                                                                                                                            | This study             |
| YB8438                        | YB5842 pMR10: <i>Pcu-lacZ</i>                                                                                                                                                                                              | This study             |
| YB173                         | YB5842 $\Delta$ <i>hfsG</i>                                                                                                                                                                                                | This study             |
| YB174                         | YB5842 pMR10: <i>Pcu-hfsG</i>                                                                                                                                                                                              | This study             |
| <b>Plasmids</b>               |                                                                                                                                                                                                                            |                        |
| pNPTS139                      | pLitmus 39 derivative, <i>oriT</i> , <i>sacB</i> , Kan <sup>r</sup>                                                                                                                                                        | M.R.K Alley            |
| pNPTS139 $\Delta$ <i>hfsA</i> | pNPTS139 containing 500 bp fragments upstream and downstream of <i>hfsA</i>                                                                                                                                                | This study             |
| pNPTS139 $\Delta$ <i>hfsL</i> | pNPTS139 containing 500 bp fragments upstream and downstream of <i>hfsL</i>                                                                                                                                                | This study             |
| pNPTS139 $\Delta$ <i>hfaB</i> | pNPTS139 containing 500 bp fragments upstream and downstream of <i>hfaB</i>                                                                                                                                                | This study             |
| pNPTS139 $\Delta$ <i>hfaD</i> | pNPTS139 containing 500 bp fragments upstream and downstream of <i>hfaD</i>                                                                                                                                                | This study             |
| pNPTS139 $\Delta$ <i>hfsD</i> | pNPTS139 containing 500 bp fragments upstream and downstream of <i>hfsD</i>                                                                                                                                                | This study             |
| pNPTS139 $\Delta$ <i>hfsG</i> | pNPTS139 containing 500 bp fragments upstream and downstream of <i>hfsG</i>                                                                                                                                                | This study             |
| pMR10                         | Mini-RK2 cloning vector; RK2 replication and stabilization functions                                                                                                                                                       | R. Roberts and C. Mohr |
| pMR10: <i>hfsA</i>            | pMR10 containing <i>hfsA</i> gene with its native promoter                                                                                                                                                                 | This study             |
| pMR10: <i>Phfa-hfaB</i>       | pMR10 containing native <i>hfaA</i> promoter and the <i>hfaB</i> gene                                                                                                                                                      | This study             |
| pMR10: <i>PhfsE-hfsL</i>      | pMR10 containing native <i>hfsE</i> promoter and the <i>hfsL</i> gene                                                                                                                                                      | This study             |
| pMR10: <i>Pcu-hfsL</i>        | pMR10 containing copper inducible promoter of <i>CopA</i> and the <i>hfsL</i> gene                                                                                                                                         | This study             |
| pMR10: <i>PhfaA-hfaD</i>      | pMR10 containing native <i>hfaA</i> promoter and the <i>hfaD</i> gene                                                                                                                                                      | This study             |
| pMR10: <i>hfsD</i>            | pMR10 containing <i>hfsD</i> gene with its native promoter                                                                                                                                                                 | This study             |
| pMR10: <i>Pcu-lacZ</i>        | pMR10 containing copper inducible promoter of <i>CopA</i> and the <i>lacZ</i> gene                                                                                                                                         | This study             |
| pMR10: <i>Pcu-hfsG</i>        | pMR10 containing copper inducible promoter of <i>CopA</i> and the <i>hfsG</i> gene                                                                                                                                         | This study             |

28 **Table S2: Primers used in this study**

| Primers       | Sequence (5'→3')                                         | Description                           |
|---------------|----------------------------------------------------------|---------------------------------------|
| HbhfsAUpF     | GCGAATTCTGGATCCACGATGAAATACGCCCGGATTATTG                 | 5' region for deletion of <i>hfsA</i> |
| HbhfsAFR      | ATACTTAGTCATTCTGATTCTGCTTTATCTAAAC                       |                                       |
| HbhfsAUpR     | CAGAAAGCTTCCTGCAGGATTAATTTAGTATCCGCCACAC                 | 3' region for deletion of <i>hfsA</i> |
| HbhfsARR      | GAATCAGAATGACTAAGTATTTGTTATTTAATTAATAAAAAATATACTTTTC     |                                       |
| HbhfsGT_pUpF  | GCCAAGCTTCTCTGCAGGATCAGTATTGTTATTCCAACATTTTCG            | 5' region for deletion of <i>hfsL</i> |
| HbhfsGT_UpR   | GTGAGTTTGGGTTGAATGCGATCCAAATC                            |                                       |
| HbhfsGT_DwF   | CGCATTCAACCCAAACTCACAAACTGAG                             | 3' region for deletion of <i>hfsL</i> |
| HbhfsGT_pDwR  | GCGAATTCTGGATCCAGATTTGGTCCAGCTCATAACG                    |                                       |
| HbhfaBUpF     | CGCGTTCGGCCGTGCTAGCGGATCATTGCTTATTCCTCG                  | 5' region for deletion of <i>hfaB</i> |
| HbhfaBFRev    | TCGCCAATTATTGCGAATTGGGCTAGTC                             |                                       |
| HbhfaBUpR     | GCAGGATATCGTGGATCCAGGAAATATCGTTGACACTGG                  | 3' region for deletion of <i>hfaB</i> |
| HbhfaBRRRev   | CAATTGCGAATAATTGGCGATAAACTTCGC                           |                                       |
| phfaDupF      | GTGCTAGCGAATTCTGGATCCACGATGTCTTGCGAAACAGAATCTCTGGAAG     | 5' region for deletion of <i>hfaD</i> |
| hfaDupR       | CTAAGTTTCTATATGTATATTGAGAACTTGGTGTCTGAGACCTTTTAGATAGGC   |                                       |
| hfaDdwF       | GCCTATCTAAAAGGTCTCAGACACCAAGTTCTCAATATACATATAGAACTTAG    | 3' region for deletion of <i>hfaD</i> |
| phfaDdwR      | GGCGCCAGAAAGCTTCCTGCAGGATATAGTATGCAATGTTTCGATGGTGG       |                                       |
| hfsDupF       | GTGCTAGCGAATTCTGGATCCACGATTTTCTGCTATCTCTGGGCAATTTTAG     | 5' region for deletion of <i>hfsD</i> |
| hfsDupR       | CTAGTGTAGTTAGTTAGCAATCTGAGGGTGTCTTTCTTAATGCATCCGTTTTG    |                                       |
| hfsDdwF       | CCAAAACGGATGCATTAAGAAAGCACCTCAGATTGCTGAACTAAACACTAG      | 3' region for deletion of <i>hfsD</i> |
| hfsDdwR       | GGCGCCAGAAAGCTTCCTGCAGGATACAGTAAAGAAAATTCATGTACAAC       |                                       |
| hfsA_upF      | ACGCCAAGCTTCCATGGGATGAAATACGCCCGGATTATTG                 | Complementation of <i>hfsA</i>        |
| hfsA_DwpR     | GCTCTGCAGGAGATCTCGATTAATTTAGTATCCGCCACAC                 |                                       |
| hfaB_upF      | ACGCCAAGCTTCCATGGGATAATTGCGCCATTGTG                      | Complementation of <i>hfaB</i>        |
| hfaB_DwpR     | GCTCTGCAGGAGATCTCGATGAAATATCGTTGACACTGGC                 |                                       |
| PhfsE_hfsLupF | CCACTTAGCTAGCAAGCTTCCATGGGATGGCCATACAAATATAAGCGGTGCTC    | Complementation of <i>hfsL</i>        |
| PhfsE_hfsLupR | CAATACTGACTTTTACCGATTGGTTTCATTACGAAGAACACAGAGTGTCTCC     | using <i>hfsE</i> promoter            |
| PhfsE_hfsLdwF | GGAGACACTCTGTGTCTTCGTGAATGAACCAATCCGTAAGTCAAGTATTG       |                                       |
| PhfsE_hfsLdwR | CTAGAGCTCTGCAGGAGATCTCGATTAAAGTTGCGCTTTTGATAACTTTTTTG    |                                       |
| Pcu_hfsLupF   | CTAGAGCTCTGCAGGAGATCTCGATTATACACGGATCGCACGCC             | Complementation of <i>hfsL</i>        |
| Pcu_hfsLupR   | GGGTGTGTAATGCCAATCAATCATGATGTTCTCTTCTTGGCTTGGAC          | using copper promoter                 |
| Pcu_hfsLdwF   | GTCCAACGCAAGAAGGAGAACATCATGATTGATTGGCATTACACACCC         |                                       |
| Pcu_hfsLdwR   | CCATGATTACGCCAAGCTTCCATGGGATTTAAGTTGCGCTTTTGATAACTTTTTTG |                                       |
| phfaABDF      | CCATGATTACGCCAAGCTTCCATGGGATCGAGACGAAAACATGAACAGTTTCAC   | Complementation of <i>hfaB</i>        |
| phfaABDF      | CTAGAGCTCTGCAGGAGATCTCGATCAGACAAACAGTTAGAAGATTTAGAAATC   |                                       |
| comphfsDupF   | CCATGATTACGCCAAGCTTCCATGGGATTTTCTGCTATCTCTGGGCAATTTTAG   | Complementation of <i>hfsD</i>        |
| comphfsDdwR   | CTAGAGCTCTGCAGGAGATCTCGATTTAGAAGGCGTTGTCTTTTAGGTTG       |                                       |
| CulacZupF     | CTAGAGCTCTGCAGGAGATCTCGATTATACACGGATCGCACGCC             | Expression of <i>lacZ</i> under       |
| CulacZupR     | CCCAGTCACGACGTTGTAACCGACCATGATGTTCTCCTTCTTGGCTTGGACG     | copper inducible promoter             |
| CulacZdwF     | CGTCCAACGCAAGAAGGAGAACATCATGGTCGTTTTACAACGTCGTGACTGGG    |                                       |
| CulacZdwR     | GATTACGCCAAGCTTCCATGGGATCGGTGGCGGCCGCTCTAGAAC            |                                       |
| hfsGupF       | GTGCTAGCGAATTCTGGATCCACGATGGTTTTAACAATCAGATTATTCGTGTC    | 5' region for deletion of <i>hfsG</i> |
| hfsGupR       | CGTTTTAATTTGGCGGGAAGGGTACATTGGATGCCTAGCGCTGTGTTTTTG      |                                       |
| hfsGdwF       | CAAAAACACAGCGTAGGCATCCAATGTACCCTTCCCGCCAAATTAACG         | 3' region for deletion of <i>hfsG</i> |
| hfsGdwR       | GGCGCCAGAAAGCTTCCCTGCAGGATCAACATTAATCCGGGAAGAATACC       |                                       |
| Pcu_hfsGupF   | GATTACGCCAAGCTTCCATGGGATATCAATCATGAAGAGCCTCCGCATATATG    | Complementation of <i>hfsG</i>        |
| Pcu_hfsGupR   | CGTCCAACGCAAGAAGGAGAACATCATGAACACAACGCCCAACTTAGCG        | using copper promoter                 |
| Pcu_hfsGdwF   | CGCTAAGTTGGGGCGTTGTGTTTCATGATGTTCTCCTTCTTGGCTTGGACG      |                                       |
| Pcu_hfsGdwR   | CTAGAGCTCTGCAGGAGATCTCGATTATACACGGATCGCACGCCTGACAATG     |                                       |

30 **Table S3: Lectin binding assays for all the lectins used.**

| Lectin                             | Specificity                                                | <i>H. baltica</i> holdfast | <i>C. crescentus</i> holdfast |
|------------------------------------|------------------------------------------------------------|----------------------------|-------------------------------|
| Wheat Germ Agglutinin              | GlcNAc, sialic acid                                        | √                          | √                             |
| Succinylated Wheat Germ Agglutinin | GlcNAc                                                     | √                          | √                             |
| Lycopersicon Esculentum Tomato     | GlcNAc 1-4                                                 | √                          | √*                            |
| Datura Stramonium Lectin           | GlcNAc 1-4                                                 | √*                         | -                             |
| Solanum Tuberosum Potato Lectin    | GlcNAc, prefers trimers and tetramers                      | √                          | √*                            |
| Ricinus Communis Agglutinin        | Galactose                                                  | √                          | -                             |
| Griffonia Simplicifolia Lectin 1   | α-GalNAc, α-galactose                                      | √                          | -                             |
| Soybean Agglutinin                 | α-GalNAc                                                   | -                          | -                             |
| Concanavalin A                     | α-linked mannose                                           | -                          | -                             |
| Dolichos Biflorus Agglutinin       | α-linked acetylgalactosamine                               | -                          | -                             |
| Peanut Agglutinin                  | Galactosyl β-1,3 N-acetylgalactosamine                     | -                          | -                             |
| Soybean Agglutinin                 | α or β acetylgalactosamine                                 | -                          | -                             |
| Ulex Europaeus Agglutinin 1        | N- acetylgalactosamine, sialic acid or chitobiose          | -                          | -                             |
| Len Culinaris Agglutinin           | α-linked mannose                                           | -                          | -                             |
| Pisum Sativum Agglutinin           | α-linked mannose, fucose or N-acetylchitobiose             | -                          | -                             |
| Erythrina Cristagalli Lectin       | Galactose, prefers Galactosyl β-1,4 N- acetylgalactosamine | -                          | -                             |
| Jacalin                            | Galactosyl β-1,3 N-acetylgalactosamine                     | -                          | -                             |
| Griffonia Simplicifolia Lectin 2   | α or β acetylgalactosamine                                 | -                          | -                             |
| Vicia Villosa Lectin               | α or β terminal N-acetylgalactosamine                      | -                          | -                             |

31 √ Fluorescent signal detected

32 - No fluorescent signal detected

33 \* Binding is enhanced on rosettes but weaker signals on single cells.

34 **Figure S1: Design of a copper inducible promoter system in *H. baltica*.**

35 **A.** Chromosomal arrangement of one of the copper sensitive operons in *H. baltica* genome,  
36 showing copper operon repressor gene *csoR* and copper binding protein genes *copA* and *copB*  
37 (top panel). The bottom diagram shows the fusion of the *copAB* promoter ( $P_{cu}$ ) to the *lacZ*  
38 reporter gene. **B.** Effect of different concentration of  $CuSO_4$  added into marine broth on *H.*  
39 *baltica* growth. Growth yield ( $OD_{600}$ ) was measured on overnight cultures with different  
40 concentration of  $CuSO_4$ . Data represent mean of four independent replicates and the error bars  
41 represent standard error. **C.** Representative growth curves of *H. baltica* growing in marine broth  
42 without or with 500  $\mu M$   $CuSO_4$ .  $OD_{600}$  representing bacterial growth in a 24 well plate was  
43 measured every 30 min. **D.**  $\beta$ -galactosidase activity representing the  $P_{cu}$  activity when induced  
44 with different concentrations of  $CuSO_4$ . Exponential cultures were induced for 4h. Data shown is  
45 representative of three independent replicates and the error bars represent the standard error.

46

47 **Figure S2: DNA inhibition of holdfast binding and biofilm formation.**

48 **A.** *C. crescentus* (upper panel) and *H. baltica* (lower panel) cells bound to a glass surface in  
49 presence of eDNA from each strain. Holdfasts labeled with WGA-AF488 lectins after  
50 exponentially grown cells were bound to a glass slide for 45 min. **B.** Biofilm quantification after  
51 24 h for *C. crescentus* and *H. baltica* in presence of eDNA. Data are expressed as an average  
52 of 4 independent replicates and the error bars represent the standard error.

53

54 **Figure S3: Fluorescence intensity of WGA-labeled holdfast**

55 **A.** Box and whisker plots of WGA fluorescence intensity distribution from holdfast images  
56 collected in Figure 4 A-B. More than 500 holdfasts were measured in 10 independent images.  
57 The variance between *H. baltica* and *C. crescentus* holdfast fluorescent intensity was analyzed  
58 using a *t*-test. ns, not statistically significant ( $p < 0.38$ ).

59

# Figure S1

**A**

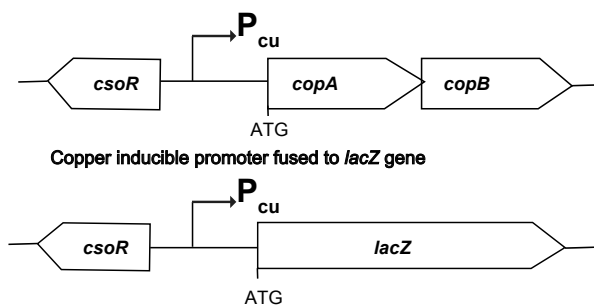

**B**

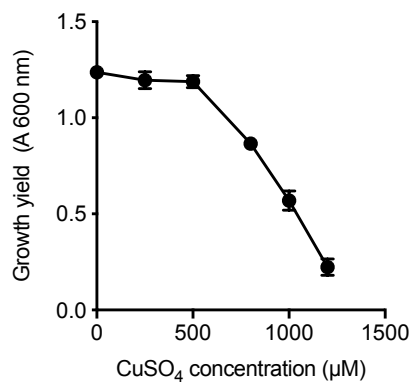

**C**

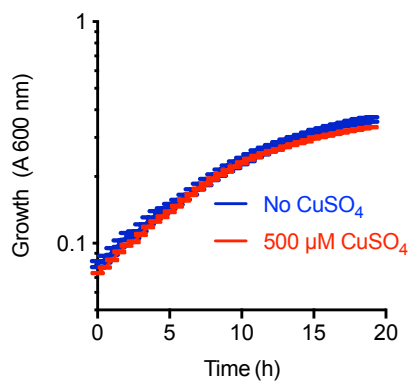

**D**

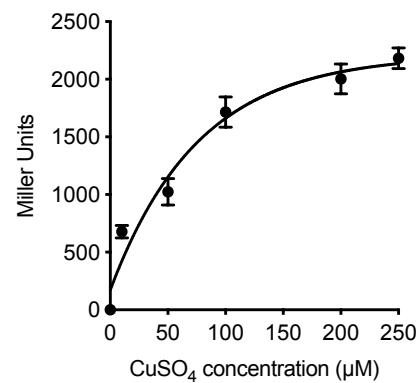

**Figure S2**

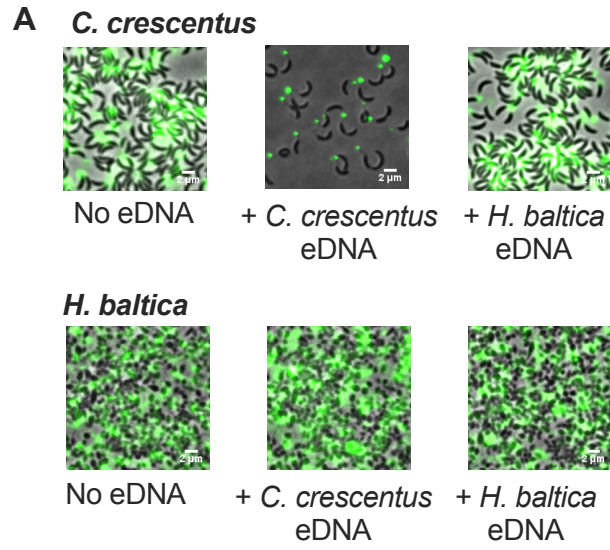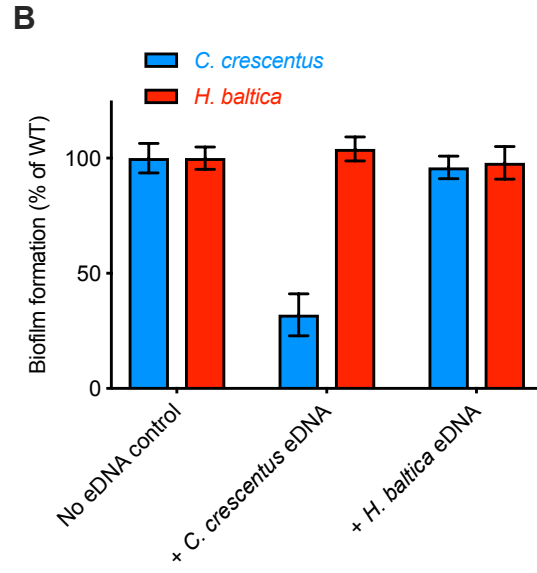

**Figure S3**

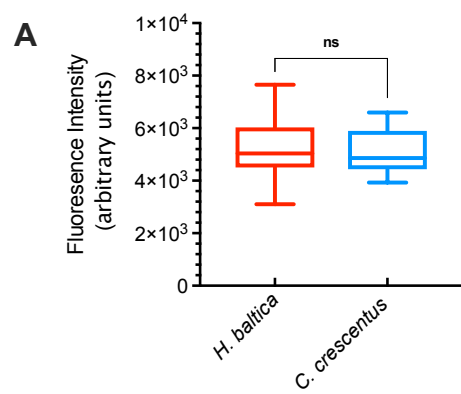



60 **SUPPLEMENTARY REFERENCES**

- 61 1. Berne C, Ellison CK, Agarwal R, Severin GB, Fiebig A, Morton III RI, Waters CM, Brun YV.  
62 2018. Feedback regulation of *Caulobacter crescentus* holdfast synthesis by flagellum  
63 assembly via the holdfast inhibitor HfiA. *Molecular microbiology* 110(2):291-238.
- 64 2. Miller JH. 1972. Assay of  $\beta$ -galactosidase. *Experiments in molecular genetics*.
- 65 3. Poindexter JS. 1964. Biological properties and classification of the *Caulobacter* group.  
66 *Bacteriological reviews* 28:231.
- 67 4. Hardy GG, Allen RC, Toh E, Long M, Brown PJ, Cole-Tobian JL, Brun YV. 2010. A localized  
68 multimeric anchor attaches the *Caulobacter* holdfast to the cell pole. *Molecular*  
69 *microbiology* 76:409-427.
- 70 5. Schlesner H, Bartels C, Sittig M, Dorsch M, Stackebrandt E. 1990. Taxonomic and  
71 Phylogenetic Studies on a New Taxon of Budding, Hyphal Proteobacteria, *Hirschia*  
72 *baltica* gen. nov., sp. nov. *International Journal of Systematic and Evolutionary*  
73 *Microbiology* 40:443-451.
- 74
